# Supplementary material for: Role of SiPHR1 in the Response to Low Phosphate in Foxtail Millet via Comparative Transcriptomic and Co-Expression Network Analyses
Source: MDPI journal article supplement (doi:10.3390/ijms241612786), 2023-08-14
Supplement: s1 [file s1]

## Supplementary Material

**Table S1.** Gene specific primers used in this study.

| Gene ID          | Primer sequence                                      | Products (bp) |
|------------------|------------------------------------------------------|---------------|
| <i>Si0g10340</i> | F: GCAGAGGTAGCAAGGAAG<br>R: ATCCAGGCACTATCCATCT      | 160           |
| <i>Si1g04550</i> | F: GCTGATGTTCTCGTCCAA<br>R: GATTGCTTGTCTCGTTG        | 132           |
| <i>Si1g33010</i> | F: CCAGCCATTACCATGAAGT<br>R: AAGTTGCCGTACCAGATG      | 80            |
| <i>Si2g29010</i> | F: ATGGCTACGGCAATTACAA<br>R: TGGCAGTGGAATATGGAAG     | 260           |
| <i>Si2g30500</i> | F: GAGCATACCGTGGACTTC<br>R: TACCAACAGCACCAGAGA       | 118           |
| <i>Si2g42340</i> | F: TCCGATTGTTGTGCTCTG<br>R: CCATCTCTTCCTGTTGTCTT     | 135           |
| <i>Si1g27930</i> | F: TCCTGTGCTAGTGTATGATG<br>R: GCTGGACCTTGTCTCAA      | 101           |
| <i>Si3g15010</i> | F: TGAAGAAGGTCCAACAAGAA<br>R: AGAAGGCTGAGGCATACT     | 265           |
| <i>Si9g40880</i> | F: ACCAAGAGCACCTGTCAT<br>R: AATCAGTCTCCGCATCTAAG     | 160           |
| <i>Si1g33510</i> | F: CAAGTTCGGCTTCAACCT<br>R: GTTCGGCATCCTCTTCTC       | 238           |
| <i>Si9g08330</i> | F: AGTCCTTCAGCTCCTACC<br>R: AACTCCTTGTGGCAGATG       | 244           |
| <i>Si9g36610</i> | F: GGAGGAGGAGTTCGTCAT<br>R: TAGTTGATGCTGCTGTAGTT     | 168           |
| <i>Si4g21330</i> | F: ATACATCATCCGCCAGAAG<br>R: AATCTTAACCACTCCAGTGT    | 166           |
| <i>Si1g05330</i> | F: CAAGAGCCTGAACAACCA<br>R: CGTAGTCCTCCTCCTTCT       | 254           |
| <i>Si9g03550</i> | F: ATGCGAGGCTAATCTTGAA<br>R: GAGTCTGTTGAGGAATCTGA    | 300           |
| <i>*EF-1α</i>    | F: CAACAAGATGGATGCCACCAC<br>R: GAGATTGGGACGAAGGCAATC | 126           |

Note: F indicated forward primer, R indicated reversed primer. \* Indicated reference genes for qRT-PCR.

**Table S2.** Quality evaluation of RNA sequencing data.

| Samples        | Obtained Reads | Obtained Base(bp) | Q20(%) | Q30(%) | GC (%) |
|----------------|----------------|-------------------|--------|--------|--------|
| 2h-NP-shoot-1  | 22,044,237     | 6,604,649,926     | 97.45  | 93.33  | 53.56  |
| 2h-NP-shoot-2  | 22,064,858     | 6,610,969,316     | 97.47  | 93.36  | 53.77  |
| 2h-NP-shoot-3  | 29,444,473     | 8,817,752,674     | 98.12  | 94.68  | 53.95  |
| 2h-LP-shoot-1  | 21,351,204     | 6,385,763,052     | 98.16  | 95.03  | 54.1   |
| 2h-LP-shoot-2  | 23,300,811     | 6,961,457,994     | 98.29  | 95.29  | 53.97  |
| 2h-LP-shoot-3  | 29,608,416     | 8,843,738,228     | 98.13  | 94.95  | 53.91  |
| 24h-NP-shoot-1 | 23,304,175     | 6,967,351,440     | 98.14  | 94.69  | 53.46  |
| 24h-NP-shoot-2 | 20,741,737     | 6,215,794,212     | 97.4   | 93.16  | 53.48  |
| 24h-NP-shoot-3 | 22,156,848     | 6,634,540,696     | 97.43  | 93.26  | 53.35  |
| 24h-LP-shoot-1 | 21,809,628     | 6,522,741,762     | 98.12  | 94.9   | 52.95  |
| 24h-LP-shoot-2 | 23,321,012     | 6,975,430,022     | 98.11  | 94.89  | 54.17  |
| 24h-LP-shoot-3 | 25,913,699     | 7,746,854,100     | 98.11  | 94.86  | 53.19  |
| 72h-NP-shoot-1 | 21,232,572     | 6,348,117,758     | 98.15  | 95.03  | 53.26  |
| 72h-NP-shoot-2 | 23,219,142     | 6,943,030,854     | 98.19  | 95.08  | 53.23  |
| 72h-NP-shoot-3 | 25,197,404     | 7,528,168,316     | 98.13  | 94.96  | 53.36  |

|                |            |               |       |       |       |
|----------------|------------|---------------|-------|-------|-------|
| 72h-LP-shoot-1 | 20,072,632 | 5,995,424,694 | 98.15 | 94.96 | 53.18 |
| 72h-LP-shoot-2 | 23,944,395 | 7,157,410,432 | 98.08 | 94.82 | 53.18 |
| 72h-LP-shoot-3 | 22,754,731 | 6,798,538,878 | 98.12 | 94.87 | 53.02 |
| 2h-NP-root-1   | 22,923,071 | 6,857,602,698 | 97.9  | 94.45 | 54.04 |
| 2h-NP-root-2   | 22,878,889 | 6,855,453,236 | 97.43 | 93.48 | 53.68 |
| 2h-NP-root-3   | 21,395,888 | 6,410,865,730 | 97.4  | 93.51 | 53.77 |
| 2h-LP-root-1   | 21,684,136 | 6,485,889,104 | 97.61 | 94.13 | 53.41 |
| 2h-LP-root-2   | 23,700,573 | 7,089,350,452 | 97.8  | 94.4  | 53.25 |
| 2h-LP-root-3   | 22,805,084 | 6,824,576,230 | 97.77 | 94.37 | 53.28 |
| 24h-NP-root-1  | 22,939,028 | 6,871,756,610 | 97.14 | 92.89 | 52.63 |
| 24h-NP-root-2  | 23,232,348 | 6,947,990,350 | 97.71 | 94.22 | 52.42 |
| 24h-NP-root-3  | 23,428,644 | 7,004,518,664 | 97.86 | 94.56 | 53.28 |
| 24h-LP-root-1  | 23,221,563 | 6,949,916,072 | 97.66 | 93.84 | 53.43 |
| 24h-LP-root-2  | 22,895,798 | 6,864,428,138 | 97.46 | 93.55 | 53.67 |
| 24h-LP-root-3  | 21,030,182 | 6,287,232,190 | 97.89 | 94.33 | 53    |
| 72h-NP-root-1  | 22,646,358 | 6,772,069,754 | 97.78 | 94.36 | 53.55 |
| 72h-NP-root-2  | 23,557,700 | 7,044,169,624 | 97.92 | 94.68 | 53.47 |
| 72h-NP-root-3  | 24,145,864 | 7,214,852,034 | 97.92 | 94.44 | 54.13 |
